# Supplementary material for: Binding of Macrophage Receptor MARCO, LDL, and LDLR to Disease-Associated Crystalline Structures
Source: PubMed Central journal article supplement (PMC7753766; doi:10.3389/fimmu.2020.596103), 2020-12-08
Supplement: DataSheet_1.pdf [file DataSheet_1.pdf]

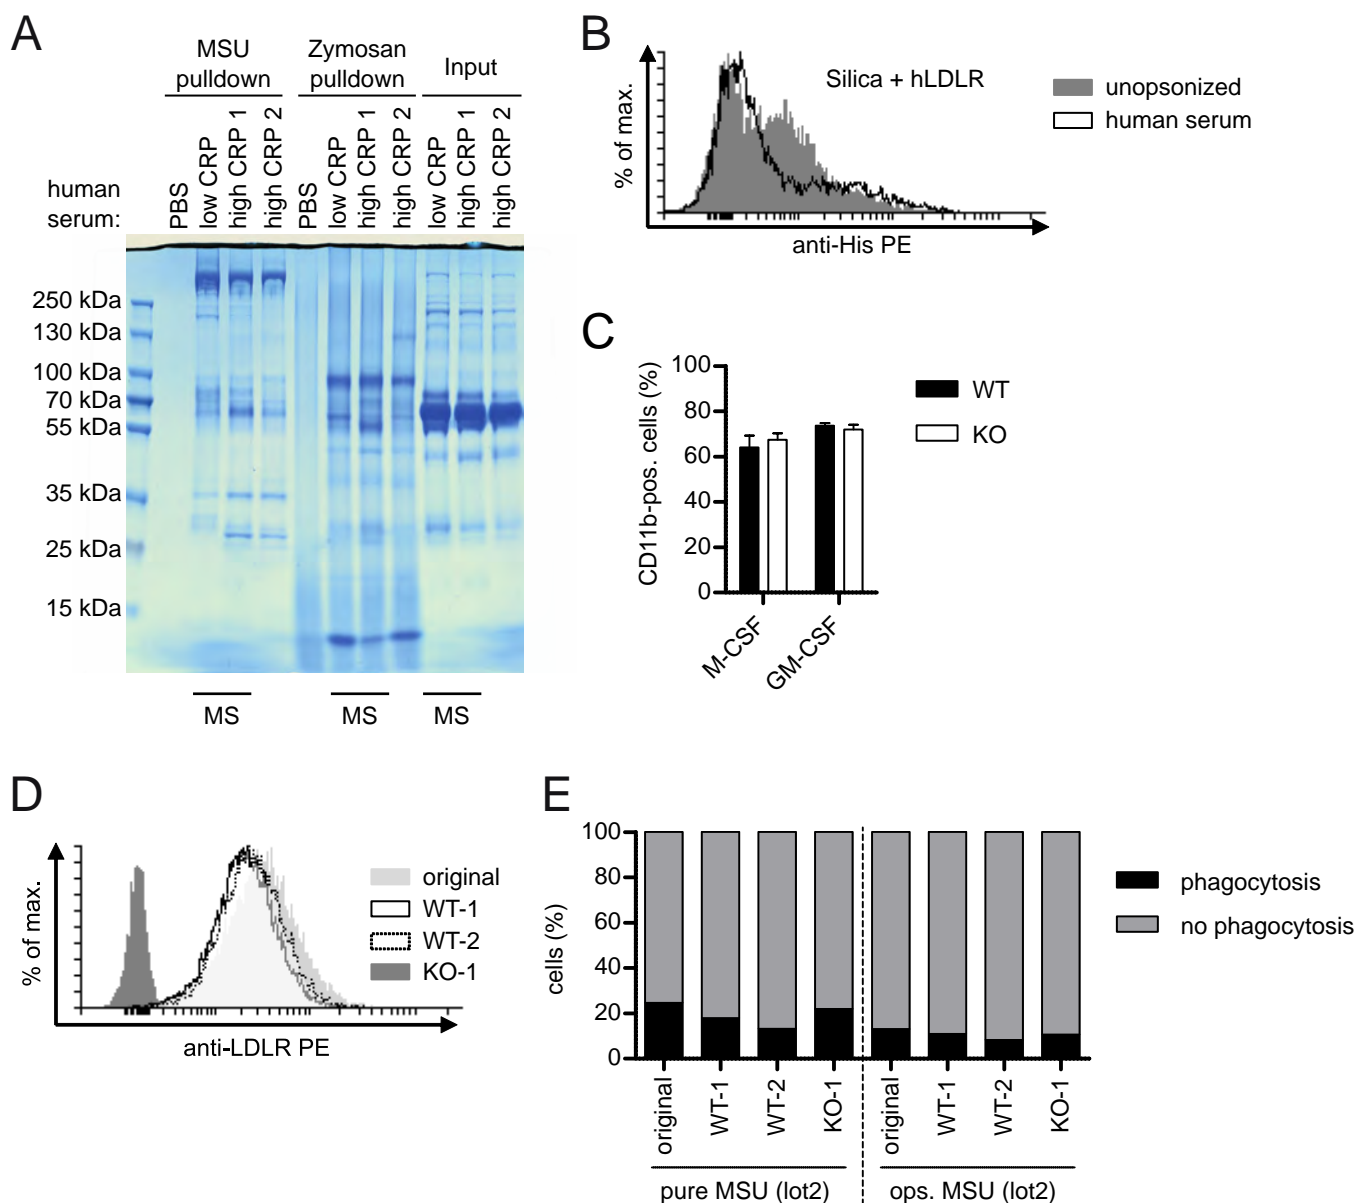

### Supplementary Figure 1.

(A) Uncropped SDS gel underlying the LS-MS analysis results in Figure 1A. (B) Binding of hLDLR to unopsonized (HBSS) and opsonized (human serum) silica crystals; histograms depicting the results of flow cytometry analysis in Figure 2B are shown. (C) CD11b expression of M-CSF- and GM-CSF-differentiated murine cells used in Figure 4. (D) LDLR expression on HepG2 cells: untreated cells (original) and CRISPR/Cas9-treated clones (WT-1, WT-2, and KO-1) were stained with anti-hLDLR PE. (E) HepG2 cell clones (see (D) for LDLR expression) were incubated with MSU (lot2) at 37°C for 30 min. Opsonized MSU crystals (ops.) were incubated with human serum at 37°C for 30 min and washed with HBSS before adding to the cells; unopsonized crystals (pure) were stored in HBSS. The amount of phagocytes was determined by counting the cells with/without intracellular MSU crystals using a polarization microscope with a 20-fold magnification.

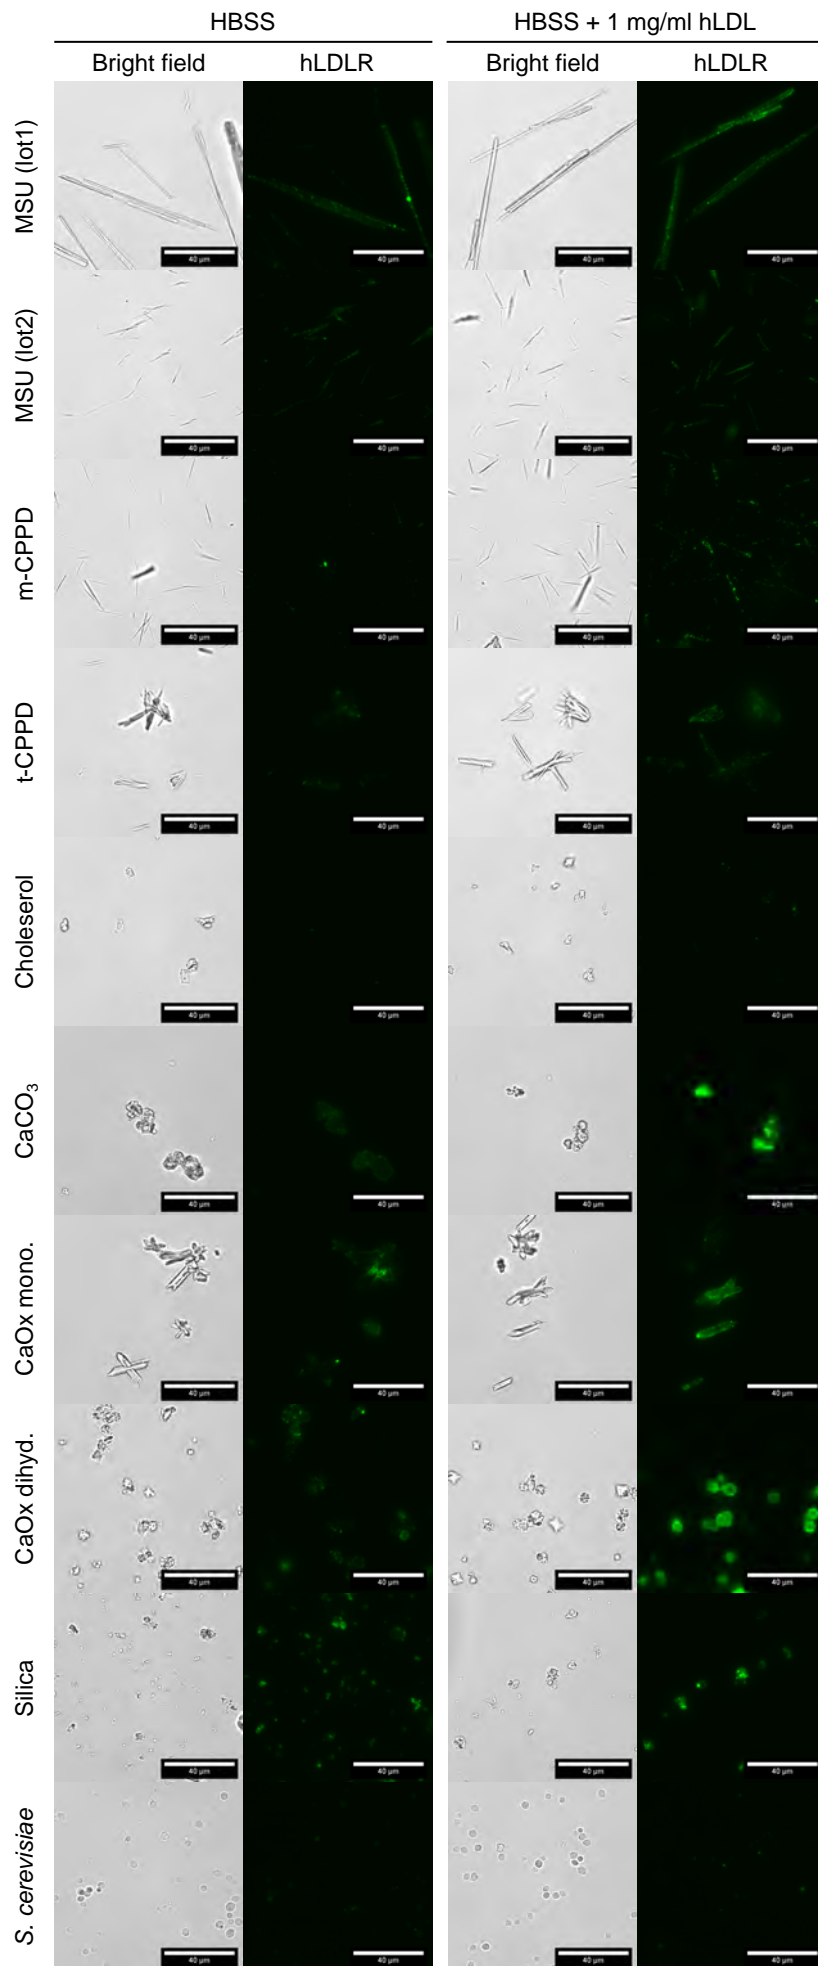

**Supplementary Figure 2.**

Indicated crystals were opsonized in HBSS or HBSS containing 1 mg/ml human LDL at 37°C for 30 min. After washing with HBSS the particles were incubated with 5 µg/ml recombinant His-tagged protein in HBSS + 5% BSA at 4°C for 60 min (hLDLR). Protein binding was analyzed using mouse anti-His Tag plus goat anti-mouse AlexaFluor488. Fluorescence of the samples was detected by fluorescent microscopy; scale bar = 40 µm.

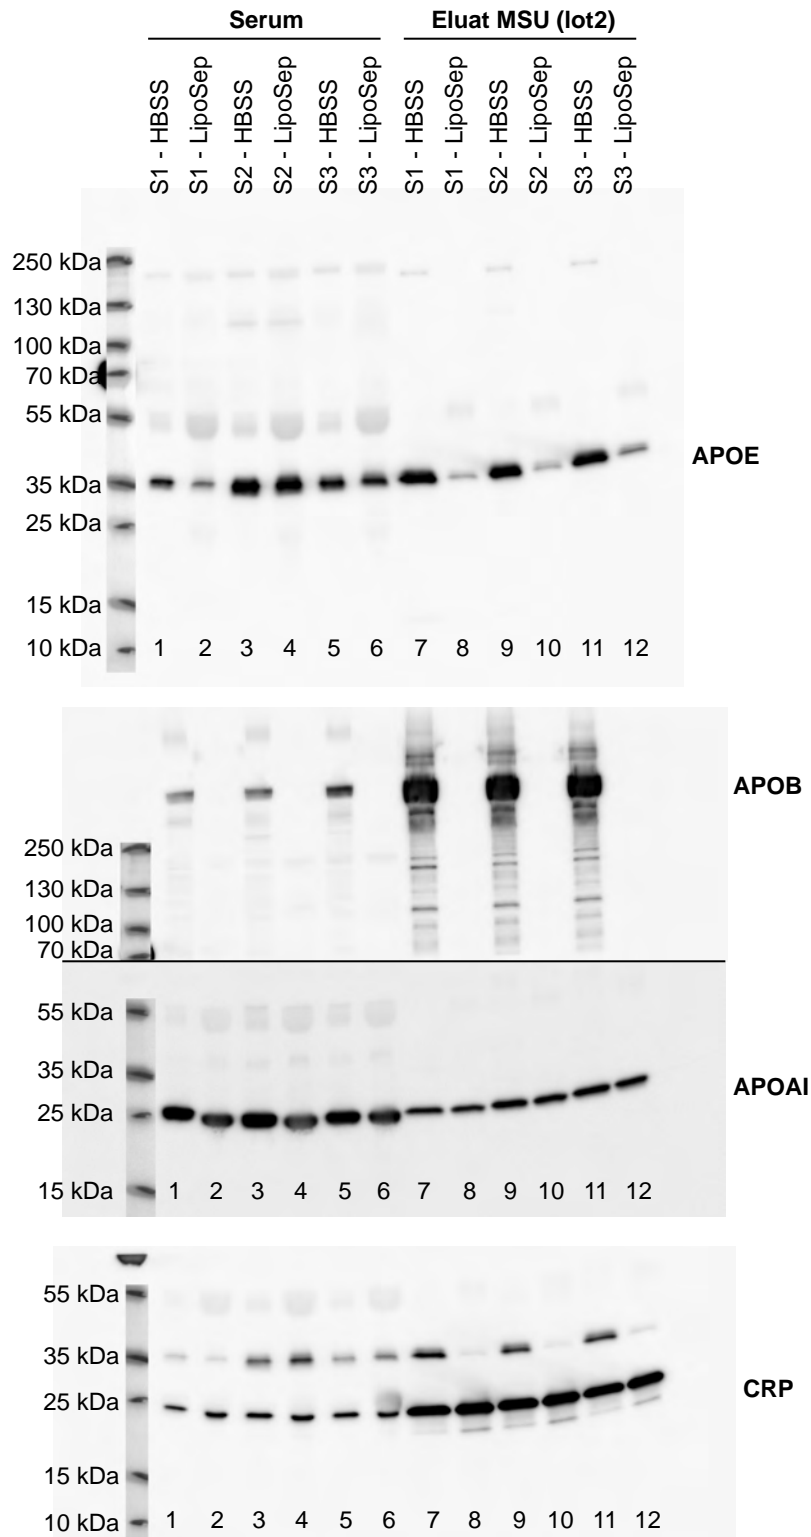

**Supplementary Figure 3.**

Sera from three individual healthy donors (S1-3) were treated either with HBSS (negative control) or LipoSep Immunoprecipitation Reagent (LDL-depleted serum). These sera were directly analyzed (serum) or incubated with MSU (lot2) crystals and crystal binding proteins were eluted and subjected to Western blot analysis. Uncropped anti-ApoE, anti-ApoB, anti-ApoAI and anti-CRP Western blots are shown.

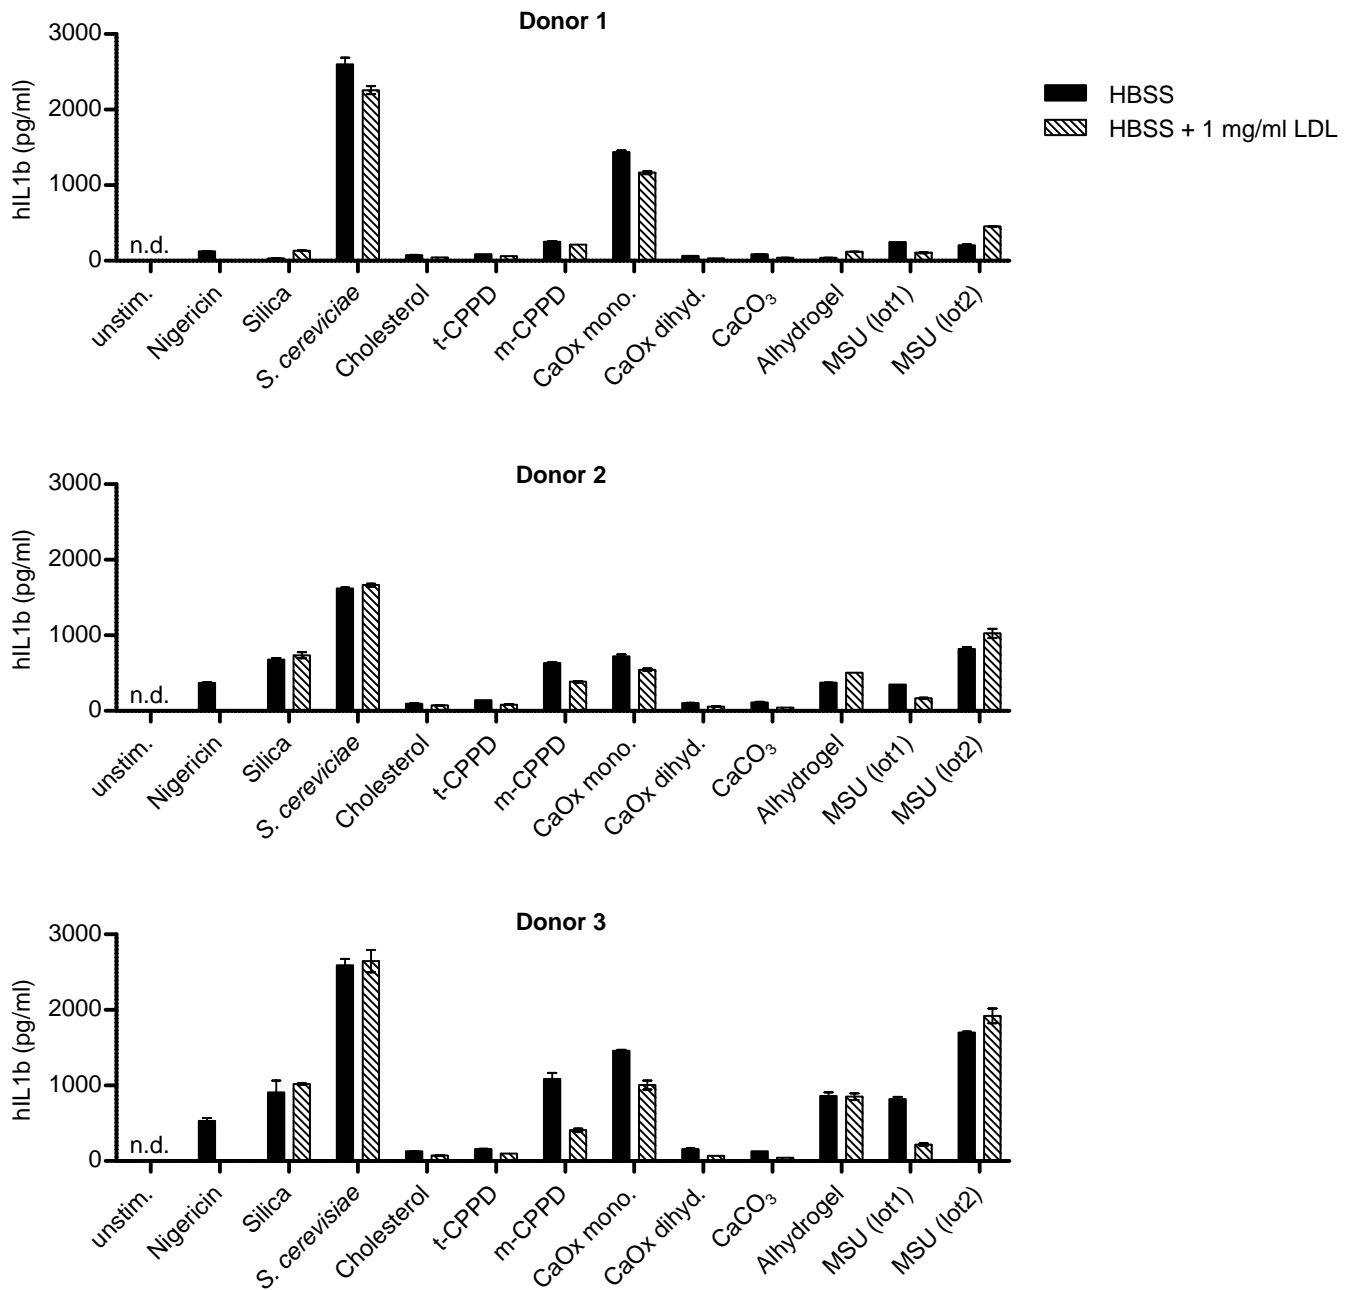

**Supplementary Figure 4.**

Human peripheral blood mononuclear cells (PBMCs) of three independent donors were stimulated with the same unopsonized and opsonized particles used in Figure 5A. Supernatants were harvested after 16 h of incubation at 37°C and subjected to ELISA. The IL-1 $\beta$  production of all three donors (1 - 3) is depicted.

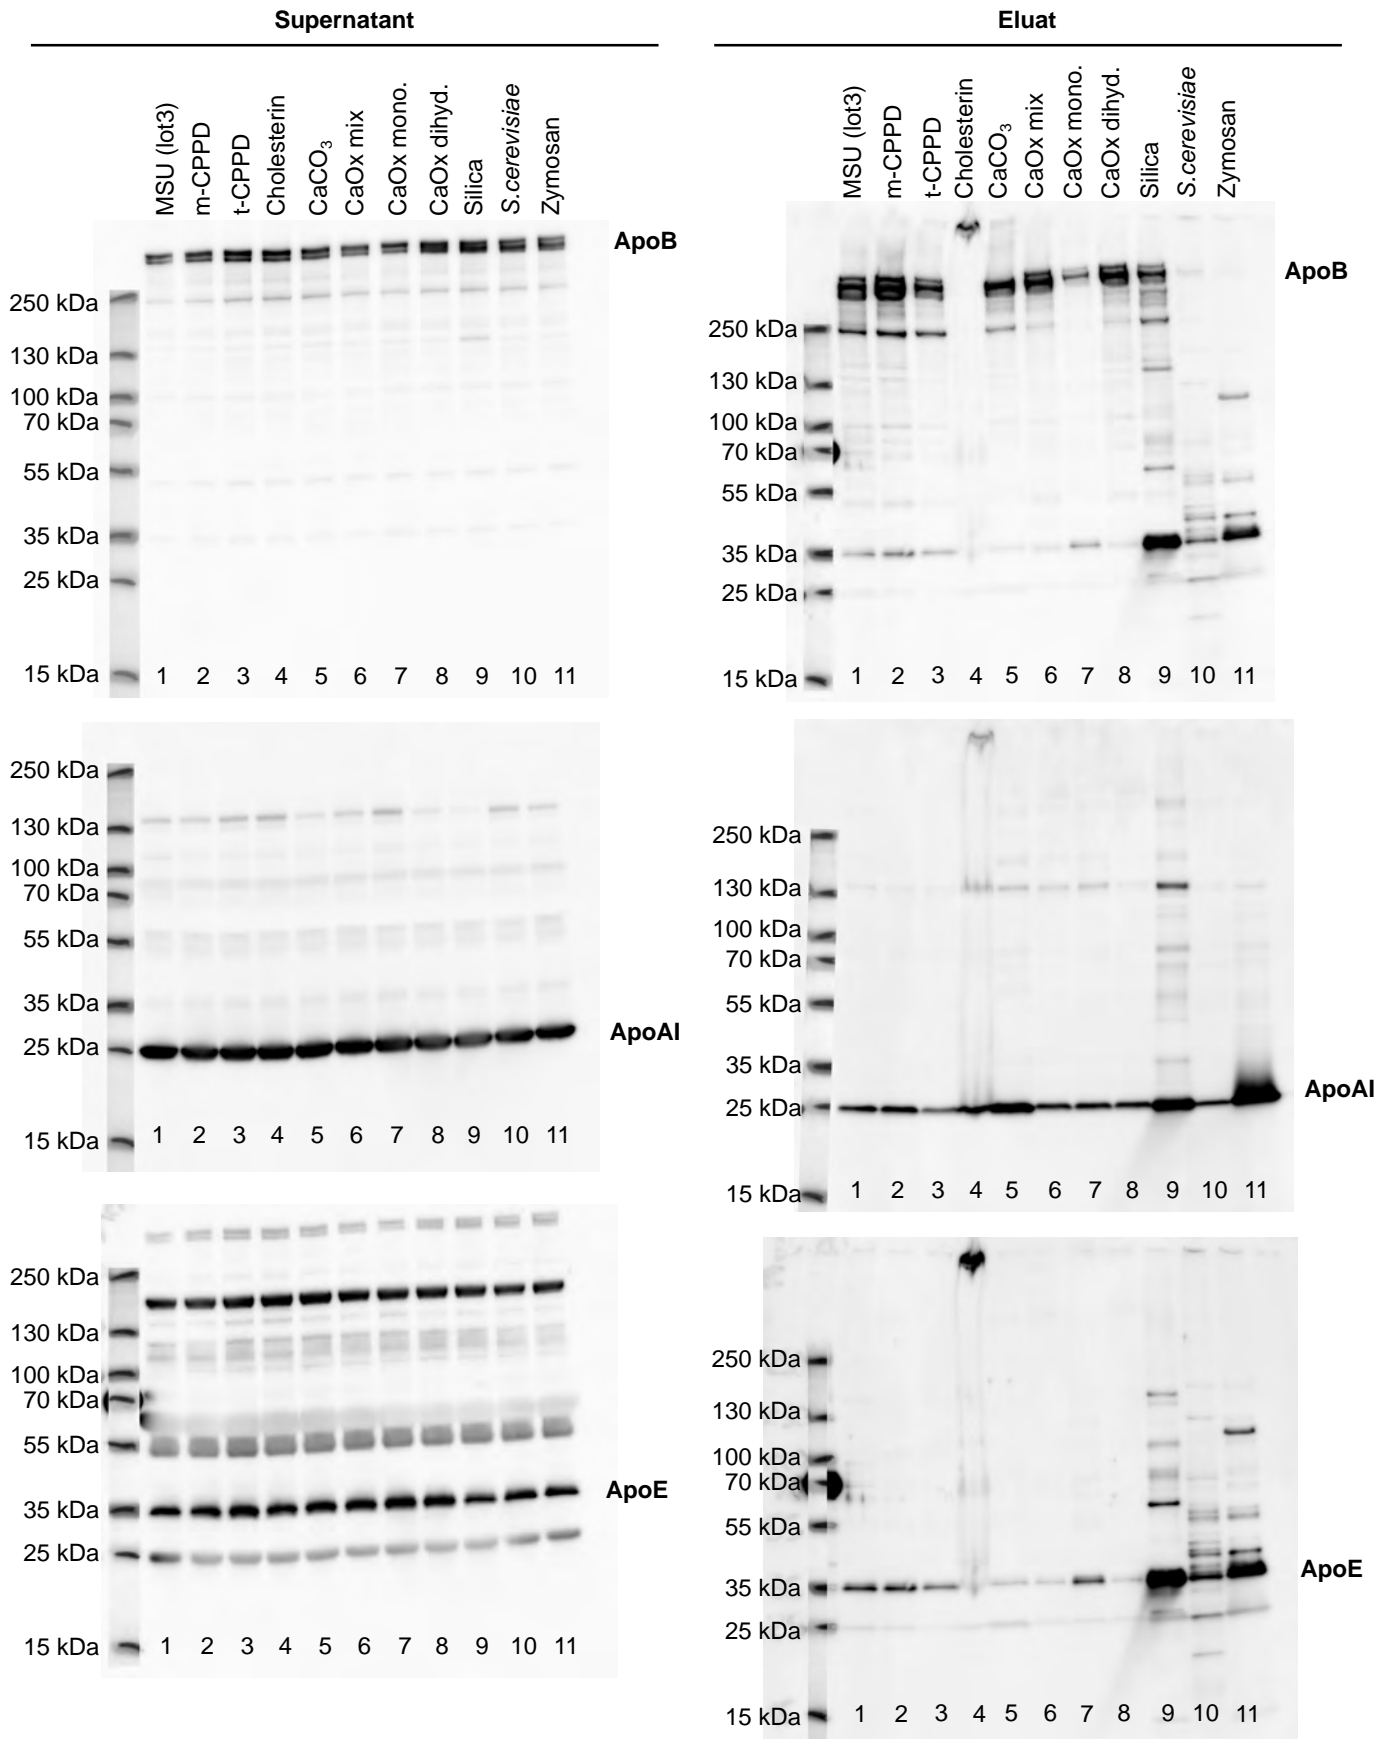

**Supplementary Figure 5.**

Uncropped anti-ApoB, anti-ApoAI, and anti-ApoE Western blots from Figure 3D.

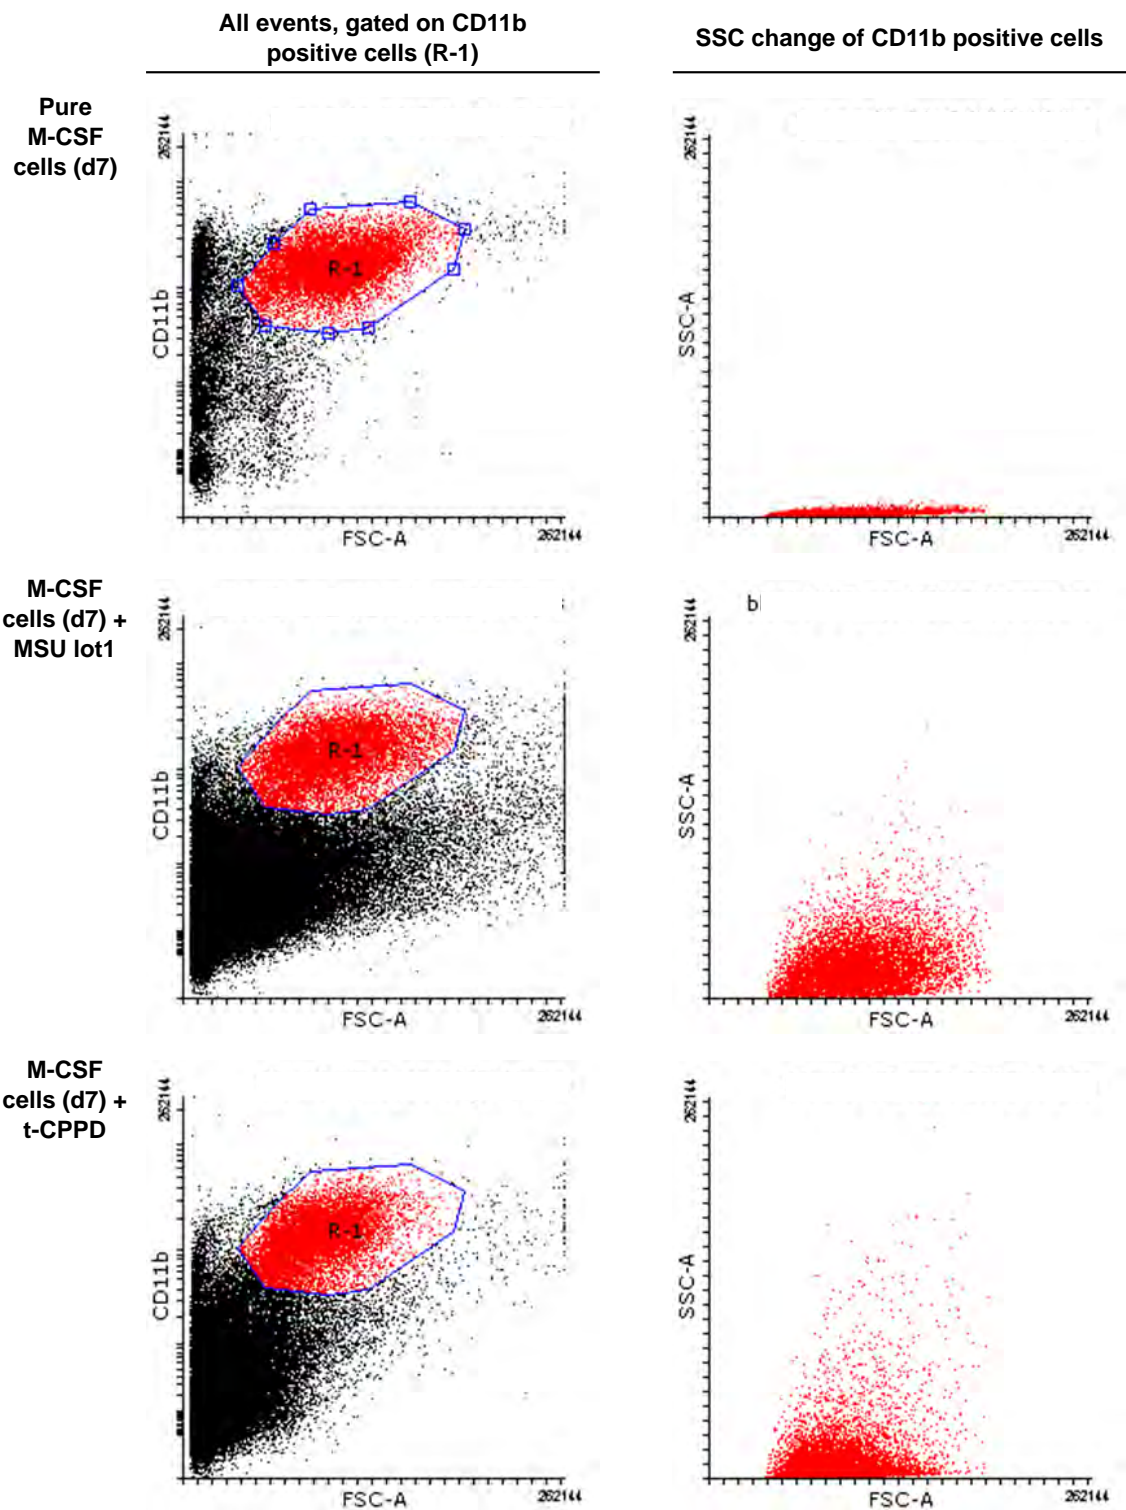

**Supplementary Figure 6.**

Representative gating strategy for phagocytosis analysis of GM-CSF- and M-CSF-differentiated cells in Figure 4A. Using flow cytometry and flowing software all events were measured and a gate was set on the CD11b positive cells (R-1) to distinguish cells from crystals (left). Then, the increase in cellular granularity (sideward-scatter, SSC) of these CD11b positive cells was assessed (right).
